# Supplementary material for: From a benzodiazaborole-based compound to donor–acceptor polymer via electropolymerization
Source: Royal Society of Chemistry journal article supplement (doi:10.1039/c2py00563h), 2012-01-01
Supplement: c2py00563h.pdf [file c2py00563h.pdf]

*Supporting Information*

***From benzodiazaborole-based compound to  
donor-acceptor polymer via electropolymerization***

*Shotaro Hayashi\*, Toshio Koizumi*

*Department of Applied Chemistry, National Defense Academy, 1-10-20 Hashirimizu,*

*Yokosuka, Kanagawa 239-9696, Japan.*

*Experimental*

All reagents and solvents were purchased from commercial sources. Synthesis of **M1** and **M2** were carried out according to the previous work.<sup>[2b]</sup> Electrodes (Pt and Ag) were polished with Al<sub>2</sub>O<sub>3</sub> before use. ITO electrode was used as received. <sup>1</sup>H- and <sup>13</sup>C-NMR spectra were recorded on a JEOL EX-270 (<sup>1</sup>H: 300 MHz, <sup>13</sup>C: 75.45 MHz) spectrometer. Elemental analyses were performed on a Thermo Finnigan Flash EA1112 CHN-O analyzer. UV-vis spectra were obtained on a Shimadzu UV-1650 spectrometer. Solid-state absorption spectra of **M1**, **M2** and **M3** were recorded by film casted on a glass plate from a toluene solution. PL spectra were obtained on a SPEX FL-3-21 Tau spectrometer. CV measurements and electropolymerization were carried out on a

HOKUTO DENKO HABF501. The XPS spectra were obtained using a PHI-1600 ESCA system.

**M3**: **M2** (54 mg, 0.20 mmol) and 3,5-dimethylbenzene-1-boronic acid (30 mg, 0.20 mmol) were dissolved in a toluene solution (2 ml). The mixture was stirred at 105 °C for 24 h. The solvent was then removed on a rotary evaporator to yield a red colored powder. The sample was then recrystallized from dichloromethane / hexane (1:9). Yield 71 mg (92 %). <sup>1</sup>H-NMR (300 MHz, CDCl<sub>3</sub>, ppm): δ 7.44-7.34 (Ar-*H*, m), 7.231 (Ar-*H*, *J* = 3.6, 2H), 7.165 (NH, s, 2H), 7.092 (Ar- *H*, s, 2H), 2.374 (-CH<sub>3</sub>,s, 6H). <sup>13</sup>C-NMR (75.45 MHz, CDCl<sub>3</sub>, ppm): δ 148.70, 141.54, 137.99, 134.52, 132.14, 131.34, 128.39, 125.37, 125.13, 120.31, 118.07, 21.748. Anal. Calcd. for (C<sub>22</sub>H<sub>19</sub>BN<sub>2</sub>S<sub>2</sub>): C, 68.39; H, 4.96; N, 7.25. Found: C, 68.29; H, 4.89; N, 7.14.

Electropolymerization of **M1** and **M3** (10 mM) was carried out in 0.1 M tetraethylammonium tetrafluoroborate / acetonitrile solution by a cyclic potential-sweep method in an undivided cell equipped with an ITO working electrode for UV-vis absorption measurements or a platinum wire working electrode for CV measurements, a platinum wire counter electrode, and a silver wire as a reference. The deposited polymer on the working electrode was rinsed with dry acetonitrile, then dry chloroform and dried under reduced pressure.

Electrochemical properties of **M1** show both the reversible oxidation and reduction potentials ( $E_{pa} = 0.94$  V,  $E_{pc} = -1.65$  V (vs. Ag/Ag<sup>+</sup>)), respectively, whereas cyclic voltammogram of **M3** shows a reversible oxidation potential at ( $E_{pa} = 0.97$  V (vs Ag/Ag<sup>+</sup>)) and an irreversible reduction potential ( $E_{pc} = -1.31$  V (vs. Ag/Ag<sup>+</sup>)) (Figure S1).

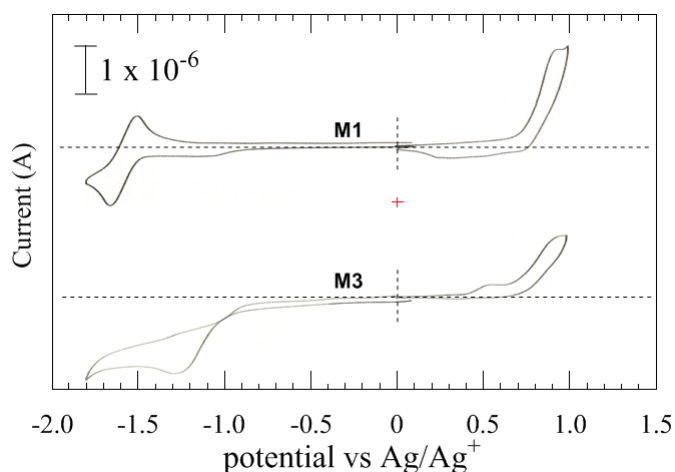

Figure S1. Cyclic voltammograms of **M1** (top) and **M3** (bottom) at 0.1 V/sec.  $\text{Fe/Fe}^+ = 0.41$  V. A three electrode system equipped with a platinum electrode, a platinum counter electrode and a Ag wire as a reference electrode was used in an electrolytic solution of acetonitrile containing 0.1 M tetraethylammonium tetrafluoroborate.

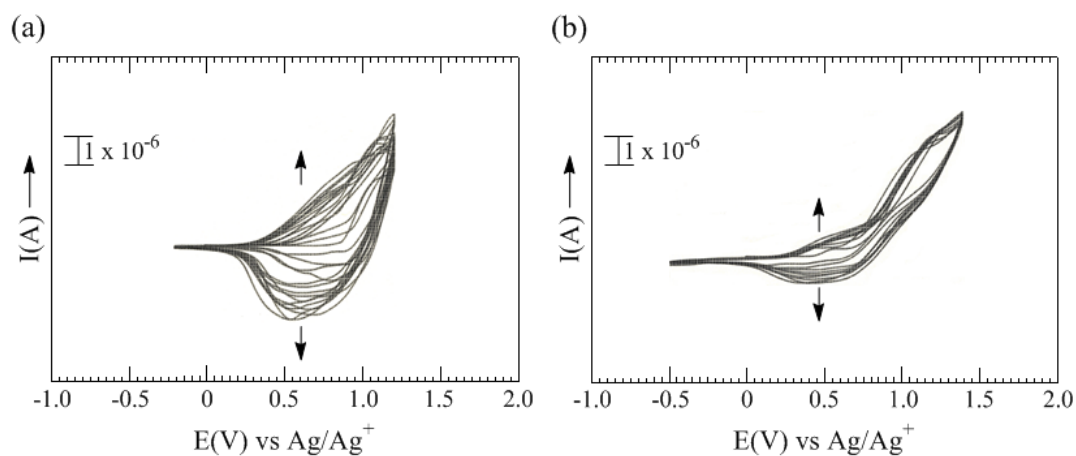

Figure S2. Electropolymerization of **M1** (a) and **M3** (b) in 10 mM  $Et_4NBF_4$ /acetonitrile at 0.1 V/sec.  $Fe/Fe^+ = 0.41$  V. A three electrode system equipped with a ITO electrode, a platinum counter electrode and a Ag wire as a reference electrode was used in an electrolytic solution of acetonitrile containing 0.1 M tetraethylammonium tetrafluoroborate.

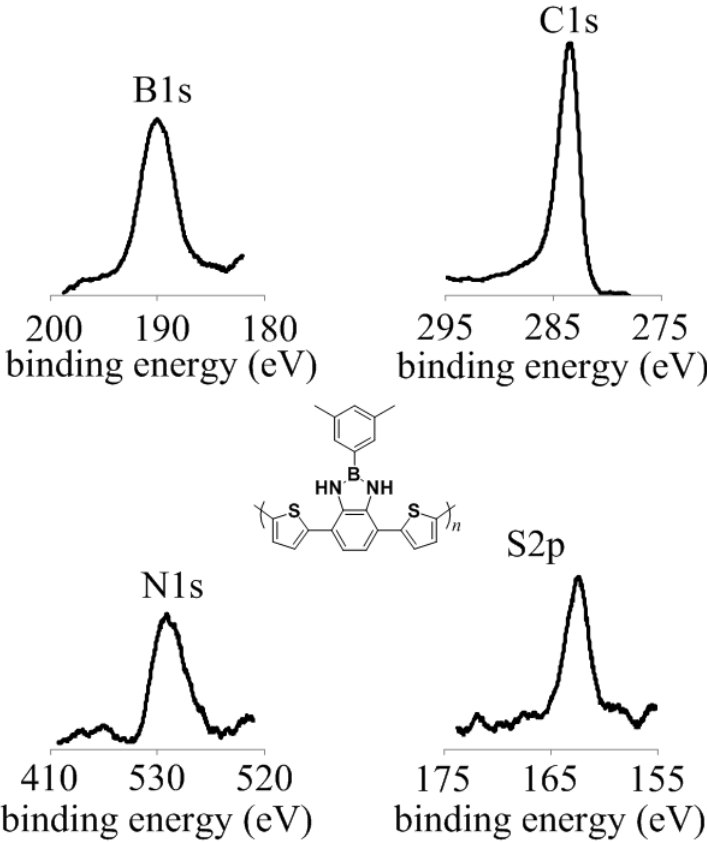

Figure S3. XPS results of **P3**.
